# Supplementary material for: Reproductive management: conditioning, spawning and development of Peruvian grunt Anisotremus scapularis in southern Peru
Source: PeerJ. 2025 Jan 6;13:e18655. doi: 10.7717/peerj.18655 (PMC11716016; doi:10.7717/peerj.18655)
Supplement: Supplemental Information 1 [file peerj-13-18655-s001.xlsx]

## Sheet: Table 1
			Chip code	BIOMETRY OF SARGO (Anisotremus scapularis) SIZE-WEIGHT
				April		May		Jun		Jul		Aug		Sep
				Weight (Kg)	Total Length (cm)	Weight (Kg)	Total Length (cm)	Weight (Kg)	Total Length (cm)	Weight (Kg)	Total Length (cm)	Weight (Kg)	Total Length (cm)	Weight (Kg)	Total Length (cm)
			939000001419265	1.775	42.8	1.841	43	2.109	43.2	1.997	43.5	2.07	44.7	2.293	44.9
			939000001418824	1.737	42.5	1.938	42.6	1.93	43	2.215	43.2	2.318	44.1	2.02	44.4
			939000001426446	1.389	40	1.457	40.5	1.491	40.6	1.594	40.9	1.649	41.4	1.629	41.9
			939000001425972	1.09	36.5	1.078	37	1.154	37.2	1.175	37.5	1.199	38.1	1.417	38.3
			939000001418802	0.992	36.1	1.195	36.6	1.301	36.9	1.153	37	1.406	38	1.192	38.5
			939000001419573	0.945	36	1.008	36.2	1.097	36.4	1.349	36.9	1.189	37.6	1.169	37.7
			939000001426408	0.718	32.7	0.779	33	0.826	33.5	0.881	34	0.912	34.7	0.859	35
			939000001426567	0.637	31.3	0.692	31.5	0.784	32	0.842	32.8	0.882	33.8	0.847	34.2
			939000001426218	0.563	30	0.559	30	0.611	30.7	0.752	31	0.788	32	0.833	32.1
			939000001418657	0.517	29.2	0.588	29.5	0.693	30.5	0.664	30.6	0.702	31	0.683	31.5
			939000001425610	0.482	27	0.497	27.7	0.528	28.1	0.564	28.5	0.575	29.3	0.598	30
			Day	month	Food (g)
			1-Apr	April	400
			2-Apr	April	400
			3-Apr	April
			4-Apr	April
			5-Apr	April	200
			6-Apr	April
			7-Apr	April
			8-Apr	April	200
			9-Apr	April	200
			10-Apr	April
			11-Apr	April	600
			12-Apr	April
			13-Apr	April
			14-Apr	April
			15-Apr	April
			16-Apr	April
			17-Apr	April
			18-Apr	April
			19-Apr	April
			20-Apr	April
			21-Apr	April
			22-Apr	April
			23-Apr	April
			24-Apr	April
			25-Apr	April	287
			26-Apr	April	261
			27-Apr	April
			28-Apr	April
			29-Apr	April	327
			30-Apr	April	421
			2024-05-01	May
			2024-05-02	May	250
			2024-05-03	May	314
			2024-05-04	May	245
			2024-05-05	May	614
			2024-05-06	May	370
			2024-05-07	May	309
			2024-05-08	May
			2024-05-09	May	300
			2024-05-10	May	118
			2024-05-11	May	175
			2024-05-12	May	300
			2024-05-13	May
			2024-05-14	May
			2024-05-15	May
			2024-05-16	May
			2024-05-17	May
			2024-05-18	May
			2024-05-19	May
			2024-05-20	May
			2024-05-21	May
			2024-05-22	May
			2024-05-23	May
			2024-05-24	May	254
			2024-05-25	May
			2024-05-26	May
			2024-05-27	May
			2024-05-28	May
			2024-05-29	May
			2024-05-30	May
			2024-05-31	May
			2024-06-01	June	122
			2024-06-02	June	347
			2024-06-03	June	171
			2024-06-04	June
			2024-06-05	June	222
			2024-06-06	June
			2024-06-07	June	245
			2024-06-08	June	180
			2024-06-09	June	195
			2024-06-10	June	356
			2024-06-11	June
			2024-06-12	June	340
			2024-06-13	June	145
			2024-06-14	June	190
			2024-06-15	June
			2024-06-16	June	147
			2024-06-17	June	189
			2024-06-18	June	200
			2024-06-19	June
			2024-06-20	June	107
			2024-06-21	June	110
			2024-06-22	June	120
			2024-06-23	June
			2024-06-24	June	206
			2024-06-25	June
			2024-06-26	June	170
			2024-06-27	June	372
			2024-06-28	June	120
			2024-06-29	June	180
			2024-06-30	June	130
			2024-07-01	July	100
			2024-07-02	July	140
			2024-07-03	July
			2024-07-04	July	269
			2024-07-05	July	228
			2024-07-06	July	45
			2024-07-07	July
			2024-07-08	July	180
			2024-07-09	July	170
			2024-07-10	July
			2024-07-11	July	235
			2024-07-12	July	123
			2024-07-13	July	285
			2024-07-14	July	203
			2024-07-15	July	180
			2024-07-16	July	120
			2024-07-17	July
			2024-07-18	July	150
			2024-07-19	July	140
			2024-07-20	July	180
			2024-07-21	July	140
			2024-07-22	July	160
			2024-07-23	July	140
			2024-07-24	July
			2024-07-25	July	229
			2024-07-26	July	250
			2024-07-27	July	160
			2024-07-28	July	152
			2024-07-29	July	124
			2024-07-30	July	150
			2024-07-31	July
			1-Aug	Augost	100
			2-Aug	Augost	140
			3-Aug	Augost
			4-Aug	Augost	269
			5-Aug	Augost	228
			6-Aug	Augost	45
			7-Aug	Augost
			8-Aug	Augost	180
			9-Aug	Augost	170
			10-Aug	Augost
			11-Aug	Augost	235
			12-Aug	Augost	123
			13-Aug	Augost	285
			14-Aug	Augost	203
			15-Aug	Augost	180
			16-Aug	Augost	120
			17-Aug	Augost
			18-Aug	Augost	150
			19-Aug	Augost	140
			20-Aug	Augost	180
			21-Aug	Augost	140
			22-Aug	Augost	160
			23-Aug	Augost	140
			24-Aug	Augost
			25-Aug	Augost	229
			26-Aug	Augost	250
			27-Aug	Augost	160
			28-Aug	Augost	152
			29-Aug	Augost	124
			30-Aug	Augost	150
			31-Aug	Augost
			1-Sep	September
			2-Sep	September	121
			3-Sep	September	105
			4-Sep	September
			5-Sep	September	100
			6-Sep	September	200
			7-Sep	September	200
			8-Sep	September	100
			9-Sep	September	150
			10-Sep	September
			11-Sep	September
			12-Sep	September
			13-Sep	September
			14-Sep	September
			15-Sep	September	80
			16-Sep	September	100
			17-Sep	September	170
			18-Sep	September
			19-Sep	September	100
			20-Sep	September	25
			21-Sep	September	50
			22-Sep	September	100
			23-Sep	September	80
			24-Sep	September	176
			25-Sep	September
			26-Sep	September	210
			27-Sep	September	90
			28-Sep	September
			29-Sep	September	120
			30-Sep	September	100
			2024-10-01	October	167
			2024-10-02	October	163
			2024-10-03	October
			2024-10-04	October	150
			2024-10-05	October	100
			2024-10-06	October	80
			2024-10-07	October	80
			2024-10-08	October	65
			2024-10-09	October
			2024-10-10	October	180
			2024-10-11	October	200
			2024-10-12	October	163
			2024-10-13	October	200
			2024-10-14	October	200
			2024-10-15	October	200
			2024-10-16	October	200
			2024-10-17	October	200
			2024-10-18	October	193
			2024-10-19	October	250
			2024-10-20	October	150
			2024-10-21	October	200
			2024-10-22	October	241
			2024-10-23	October
			2024-10-24	October	221
			2024-10-25	October	200
			2024-10-26	October	160
			2024-10-27	October	180
			2024-10-28	October	250
			2024-10-29	October	247
			2024-10-30	October
			2024-10-31	October
			2024-11-01	November
			2024-11-02	November	200
			2024-11-03	November	200
			2024-11-04	November	200
			2024-11-05	November	204
			2024-11-06	November
			2024-11-07	November	250
			2024-11-08	November	250
			2024-11-09	November	100
			2024-11-10	November	250
			2024-11-11	November	100
			2024-11-12	November	173
			2024-11-13	November
			2024-11-14	November	250
			2024-11-15	November	200
			2024-11-16	November	200
			2024-11-17	November	200
			2024-11-18	November	200
			2024-11-19	November	104
			2024-11-20	November
			2024-11-21	November	170
			2024-11-22	November
			2024-11-23	November	160
			2024-11-24	November	200
			2024-11-25	November
			2024-11-26	November	347
			2024-11-27	November
			2024-11-28	November	200
			2024-11-29	November	200
			2024-11-30	November	250
			1-Dec	December	200
			2-Dec	December	200
			3-Dec	December	225
			4-Dec	December
			5-Dec	December	200
			6-Dec	December	200
			7-Dec	December	200
			8-Dec	December	200
			9-Dec	December
			10-Dec	December	325
			11-Dec	December
			12-Dec	December	200
			13-Dec	December	200
			14-Dec	December	200
			15-Dec	December	200
			16-Dec	December	250
			17-Dec	December	380
			18-Dec	December
			19-Dec	December	250
			20-Dec	December	200
			21-Dec	December	250
			22-Dec	December	200
			23-Dec	December	200
			24-Dec	December	200
			25-Dec	December
			26-Dec	December	250
			27-Dec	December	500
			28-Dec	December	400
			29-Dec	December	200
			30-Dec	December	600
			31-Dec	December	392
			1-Jan	January	210
			2-Jan	January
			3-Jan	January	250
			4-Jan	January	450
			5-Jan	January	200
			6-Jan	January	400
			7-Jan	January	400
			8-Jan	January
			9-Jan	January	400
			10-Jan	January	200
			11-Jan	January	400
			12-Jan	January	200
			13-Jan	January	350
			14-Jan	January	350
			15-Jan	January
			16-Jan	January	400
			17-Jan	January	200
			18-Jan	January	400
			19-Jan	January	200
			20-Jan	January	300
			21-Jan	January	300
			22-Jan	January
			23-Jan	January	300
			24-Jan	January	200
			25-Jan	January	350
			26-Jan	January	250
			27-Jan	January	350
			28-Jan	January	300
			29-Jan	January
			30-Jan	January	360
			31-Jan	January	200
			2024-02-01	February	550
			2024-02-02	February	200
			2024-02-03	February	250
			2024-02-04	February
			2024-02-05	February	250
			2024-02-06	February	250
			2024-02-07	February	300
			2024-02-08	February	200
			2024-02-09	February	200
			2024-02-10	February	222
			2024-02-11	February
			2024-02-12	February	300
			2024-02-13	February	250
			2024-02-14	February
			2024-02-15	February	200
			2024-02-16	February	100
			2024-02-17	February	60
			2024-02-18	February
			2024-02-19	February	180
			2024-02-20	February	200
			2024-02-21	February	200
			2024-02-22	February	200
			2024-02-23	February
			2024-02-24	February	300
			2024-02-25	February
			2024-02-26	February	300
			2024-02-27	February	285
			2024-02-28	February
				February
			2024-03-01	March	350
			2024-03-02	March
			2024-03-03	March	370
			2024-03-04	March	200
			2024-03-05	March	300
			2024-03-06	March	200
			2024-03-07	March	300
			2024-03-08	March	300
			2024-03-09	March
			2024-03-10	March	300
			2024-03-11	March	300
			2024-03-12	March	300
			2024-03-13	March	200
			2024-03-14	March	300
			2024-03-15	March	300
			2024-03-16	March
			2024-03-17	March	250
			2024-03-18	March	300
			2024-03-19	March	300
			2024-03-20	March	200
			2024-03-21	March	300
			2024-03-22	March	222
			2024-03-23	March
			2024-03-24	March
			2024-03-25	March	200
			2024-03-26	March	200
			2024-03-27	March	200
			2024-03-28	March	300
			2024-03-29	March	300
			2024-03-30	March
			2024-03-31	March
			1-Apr	April	350
			2-Apr	April
			3-Apr	April	370
			4-Apr	April	200
			5-Apr	April	300
			6-Apr	April	200
			7-Apr	April	300
			8-Apr	April	300
			9-Apr	April
			10-Apr	April	300
			11-Apr	April	300
			12-Apr	April	300
			13-Apr	April	200
			14-Apr	April	300
			15-Apr	April	300
			16-Apr	April
			17-Apr	April	250
			18-Apr	April	300
			19-Apr	April	300
			20-Apr	April	200
			21-Apr	April	300
			22-Apr	April	222
			23-Apr	April
			24-Apr	April
			25-Apr	April	200
			26-Apr	April	200
			27-Apr	April	200
			28-Apr	April	300
			29-Apr	April	300
			30-Apr	April
			2024-05-01	May	200
			2024-05-02	May	200
			2024-05-03	May	200
			2024-05-04	May	200
			2024-05-05	May	200
			2024-05-06	May	250
			2024-05-07	May	200
			2024-05-08	May	300
			2024-05-09	May	300
			2024-05-10	May	200
			2024-05-11	May	500
			2024-05-12	May	300
			2024-05-13	May	350
			2024-05-14	May	250
			2024-05-15	May	260
			2024-05-16	May	260
			2024-05-17	May	200
			2024-05-18	May	527
			2024-05-19	May	132
			2024-05-20	May	200
			2024-05-21	May
			2024-05-22	May	200
			2024-05-23	May	200
			2024-05-24	May	200
			2024-05-25	May	200
			2024-05-26	May	200
			2024-05-27	May	200
			2024-05-28	May
			2024-05-29	May	447
			2024-05-30	May	355
			2024-05-31	May	380
			2024-06-01	June	122		122
			2024-06-02	June	347
			2024-06-03	June	171
			2024-06-04	June
			2024-06-05	June	222
			2024-06-06	June
			2024-06-07	June	245
			2024-06-08	June	180
			2024-06-09	June	195
			2024-06-10	June	356
			2024-06-11	June
			2024-06-12	June	340
			2024-06-13	June	145
			2024-06-14	June	190
			2024-06-15	June
			2024-06-16	June	147
			2024-06-17	June	189
			2024-06-18	June	200
			2024-06-19	June
			2024-06-20	June	107
			2024-06-21	June	110
			2024-06-22	June	320
			2024-06-23	June	206
			2024-06-24	June	200
			2024-06-25	June	170
			2024-06-26	June	372
			2024-06-27	June	120
			2024-06-28	June	180
			2024-06-29	June	130
			2024-06-30	June	140
			2024-07-01	July
			2024-07-02	July
			2024-07-03	July	200
			2024-07-04	July	200
			2024-07-05	July	200
			2024-07-06	July	200
			2024-07-07	July	200
			2024-07-08	July	180
			2024-07-09	July
			2024-07-10	July
			2024-07-11	July
			2024-07-12	July
			2024-07-13	July
			2024-07-14	July	200
			2024-07-15	July	150
			2024-07-16	July
			2024-07-17	July	200
			2024-07-18	July	200
			2024-07-19	July
			2024-07-20	July
			2024-07-21	July	200
			2024-07-22	July	200
			2024-07-23	July
			2024-07-24	July	160
			2024-07-25	July	250
			2024-07-26	July	250
			2024-07-27	July	250
			2024-07-28	July	200
			2024-07-29	July	180
			2024-07-30	July	120
			2024-07-31	July
			1-Aug	Augost	200		200
			2-Aug	Augost	150
			3-Aug	Augost	100
			4-Aug	Augost	150
			5-Aug	Augost	200
			6-Aug	Augost
			7-Aug	Augost	150
			8-Aug	Augost	150
			9-Aug	Augost	150
			10-Aug	Augost	150
			11-Aug	Augost	200
			12-Aug	Augost
			13-Aug	Augost
			14-Aug	Augost	200
			15-Aug	Augost	200
			16-Aug	Augost	200
			17-Aug	Augost	150
			18-Aug	Augost	150
			19-Aug	Augost	200
			20-Aug	Augost
			21-Aug	Augost	150
			22-Aug	Augost	150
			23-Aug	Augost	150
			24-Aug	Augost	150
			25-Aug	Augost	150
			26-Aug	Augost	150
			27-Aug	Augost
			28-Aug	Augost
			29-Aug	Augost	150
			30-Aug	Augost	200
			31-Aug	Augost	128
			1-Sep	September	150		150
			2-Sep	September
			3-Sep	September	150
			4-Sep	September	150
			5-Sep	September
			6-Sep	September	150
			7-Sep	September	150
			8-Sep	September	200
			9-Sep	September	200
			10-Sep	September
			11-Sep	September	100
			12-Sep	September	150
			13-Sep	September	200
			14-Sep	September	150
			15-Sep	September	150
			16-Sep	September	220
			17-Sep	September
			18-Sep	September	200
			19-Sep	September	150
			20-Sep	September	200
			21-Sep	September	200
			22-Sep	September	150
			23-Sep	September	200
			24-Sep	September
			25-Sep	September	200
			26-Sep	September	200
			27-Sep	September	200
			28-Sep	September	200
			29-Sep	September	200
			30-Sep	September	200

## Sheet: Table 2
	Chip code	BIOMETRY OF SARGO (Anisotremus scapularis) SIZE-WEIGHT
		April		May		Jun		Jul		Aug		Sep
		Weight (Kg)	Total Length (cm)	Weight (Kg)	Total Length (cm)	Weight (Kg)	Total Length (cm)	Weight (Kg)	Total Length (cm)	Weight (Kg)	Total Length (cm)	Weight (Kg)	Total Length (cm)
	939000001419265	1.775	42.8	1.841	43	2.109	43.2	1.997	43.5	2.07	44.7	2.293	44.9
	939000001418824	1.737	42.5	1.938	42.6	1.93	43	2.215	43.2	2.318	44.1	2.02	44.4
	939000001426446	1.389	40	1.457	40.5	1.491	40.6	1.594	40.9	1.649	41.4	1.629	41.9
	939000001425972	1.09	36.5	1.078	37	1.154	37.2	1.175	37.5	1.199	38.1	1.417	38.3
	939000001418802	0.992	36.1	1.195	36.6	1.301	36.9	1.153	37	1.406	38	1.192	38.5
	939000001419573	0.945	36	1.008	36.2	1.097	36.4	1.349	36.9	1.189	37.6	1.169	37.7
	939000001426408	0.718	32.7	0.779	33	0.826	33.5	0.881	34	0.912	34.7	0.859	35
	939000001426567	0.637	31.3	0.692	31.5	0.784	32	0.842	32.8	0.882	33.8	0.847	34.2
	939000001426218	0.563	30	0.559	30	0.611	30.7	0.752	31	0.788	32	0.833	32.1
	939000001418657	0.517	29.2	0.588	29.5	0.693	30.5	0.664	30.6	0.702	31	0.683	31.5
	939000001425610	0.482	27	0.497	27.7	0.528	28.1	0.564	28.5	0.575	29.3	0.598	30
	Mean	0.985909	34.9182	1.05745	35.2364	1.13855	35.6455	1.19873	35.9909	1.24455	36.7909	1.23091	37.1364
	SD	0.469893	5.36746	0.506436	5.3309	0.528558	5.15778	0.544803	5.10695	0.567591	5.16691	0.556234	5.10397
	Sum	10.845		11.632		12.524		13.186		13.69		13.54

## Sheet: Table 3
	No. of eggs
		TEMP1
		2016		Year	Month	Egg survival		Egg hatching
	October	132.348				No. Survival x 103	Survival rate (%)	No. Survival x 103	Survival rate (%)
	November	0		2016	Oct	0.132348	75.105	0.0645472	48.7708
	December	6776.28			Nov
	January	6903.14			Dec	6.77628	97.3877	4.702	69.389
	Febrary	367.932		2017	Jan	6.90314	92.6768	4.67959	67.7893
	March	5208.34			Feb	0.367932	50.8578	0.155252	42.196
	April	2114.16			Mar	5.20834	87.3524	3.52056	67.5946
	May	1777.84			Apr	2.11416	83.8027	1.43259	67.7616
	SUMA	23280.1			May	1.77784	86.6104	1.35391	76.1547
	Total (x 10^6)	23.2801		Mean		3.32572	81.9704	2.27264	62.808
	PROMEDIO	2910.01		SD		2.91715	15.391	2.00671	12.3532
	Fertilized eggs
		TEMP1
		2016
	October	99.4
	November	0
	December	6599.27
	January	6397.61
	Febrary	187.122
	March	4549.61
	April	1771.72
	May	1539.8
	SUMA	21144.5
	PROMEDIO	2643.07

## Sheet: Figure 5
	Temperature	Oxygen				Temperature	Oxygen	SD_Temperature	SD_Oxygen
April	19.2667			April	Apr	18.5911	7.86133	0.668723	0.205404
April	19.9333			May	May	17.2984	7.78086	0.740859	0.142955
April	19.2667			June	Jun	16.8624	7.62483	0.502411	0.32714
April	19.7667	7.94333		July	Jul	16.5661	7.51613	0.468221	0.303502
April	19	7.61667		Augost	Aug	17.2328	7.17425	0.409075	0.20628
April	19.7	7.57		September	Sep	16.4278	7.84042	0.502357	0.292684
April	19.2	8.01		October	Oct	17.879	7.035	0.928599	0.340441
April	18.5	7.97333		November	Nov	18.3539	6.423	0.892279	0.596778
April	18.05	8.12		December	Dec	18.1207	6.92167	0.929498	0.434583
April	17.9	7.58333		January	Jan	19.7336	4.40301	1.29139	0.662801
April	17.9	7.86333		February	Feb	18.8101	4.34143	1.13044	0.602432
April	18.25	7.85		March	Mar	18.5946	5.213	0.488694	0.668734
April	18.1125	8.08333
April	18.2875
April	19
April	19.7
April	19.2
April	18.5
April	18.05
April	17.9
April	17.9
April	18.25
April	18.1125
April	18.2875
April	18.875
April	18.85
April	18.175
April	17.475
April	18.25
April	18.075
May	18.875	7.70667
May	18.85	8.19
May	18.175	7.79
May	17.475	7.83667
May	18.25	7.60667
May	18.075	7.48
May	17.95	7.64667
May	18.3	7.78333
May	18.25	7.77333
May	17.9	7.76667
May	17.675	7.81667
May	16.825	7.89
May	16.675	7.85
May	16.525	7.91333
May	17.45	7.82333
May	17.375	7.75333
May	16.75	7.85667
May	16.9	7.79333
May	16.825	7.87333
May	17.05	7.84
May	16.95	7.86667
May	16.675	7.66667
May	16.975	7.63333
May	17	7.49667
May	16.45	7.78667
May	16.2	7.95
May	16.2	7.91667
May	16.85	7.84
May	16.975	7.53333
May	16.95	7.70667
May	16.875	7.82
June	17
June	17.3333	7.55
June	18	7.72
June	17.575	7.82
June	17.365	7.87
June	17.2333	7.92
June	16	8.31
June	16.4	7.9
June	16.4	8.04
June	16.3	7.63
June	16.95	7.95
June	16.525	6.96
June	17.475	7.06
June	16.625	7.25
June	17.1	7.11
June	16.725	7.61
June	16.575	7.68
June	17.4667	7.7
June	17.275	7.54
June	17.025	7.61
June	17.2	7.66
June	16.9667	7.45
June	16.3	7.75
June	16.5	7.56
June	16.45	7.87
June	16.1	8.14
June	16.075	7.05
June	17	7.455
June	16.7	7.55
June	17.2333	7.405
July	16.9	7.48
July	16.975	7.24333
July	16.575	7.5
July	16.725	7.55333
July	16.9	7.56333
July	15.825	7.58333
July	16.175	7.99
July	16.5	7.67667
July	16.35	7.66
July	16.25	7.03333
July	16.5	7.36
July	16.275	7.27667
July	16.05	7.68333
July	16.125	7.41333
July	16.25	7.79333
July	16.125	7.9
July	16.125	7.57
July	16	7.88667
July	15.95	7.92333
July	16.2	7.86667
July	16.65	7.63
July	16.65	7.58333
July	16.725	6.83
July	16.475	6.81333
July	16.85	7.53
July	17	7.7
July	17.325	7.01333
July	16.65	7.73
July	17.4	7.44667
July	17.5	7.23
July	17.55	7.53667
Augost	17.6667	7.39333
Augost	16.85	7.36
Augost	16.7	7.57
Augost	16.9667	7.40667
Augost	17.5333	7.26333
Augost	17.8333	6.9
Augost	18.05	7.1
Augost	17.2	7.29333
Augost	17.0333	7.41
Augost	16.65	7.44
Augost	17.2	6.88333
Augost	17.5333	6.68333
Augost	17.5333	7.06667
Augost	17.5667	7.195
Augost	17.7	6.95667
Augost	17.6667	6.79333
Augost	17.8	7.05667
Augost	17.3333	7.08333
Augost	16.9333	7.11667
Augost	17.0667	7.13
Augost	16.5667	7.47
Augost	17.2333	7.09
Augost	17.6333	7.12333
Augost	17.3333	7.16
Augost	16.5	7.32
Augost	17.1	7.00333
Augost	17.4333	7.18333
Augost	16.9667	7.24
Augost	16.95	7.385
Augost	16.9333	7.165
Augost	16.75	7.16
September	16.1667	7.57333
September	16.2	7.21333
September	15.5333	7.95667
September	15.9333	7.67
September	16.2	7.54667
September	16.3667	7.69
September	16.4333	7.67333
September	16.4667	7.68
September	16.85	7.9
September	16.5667	7.92
September	16.5667	7.69667
September	16.1333	7.96667
September	16.0333	7.88667
September	16.5333	7.69667
September	16.5	7.72333
September	16.4	7.90667
September	15.5333	8.00667
September	15.4333	8.445
September	16.1	8.30333
September	16.3333	8.35333
September	16.8667
September	17.0333
September	16.7333
September	16.5667
September	16.8667
September	17.6
September	17.6
September	16.1667
September	16.55
September	16.5667
October	17.5
October	16.8667
October	16.4667
October	18.5
October	17.25
October	17.2667
October	18.3333
October	18.6
October	19.3
October	18.2333
October	17.7333
October	17.1667
October	17.2667
October	18.2667
October	18.6333
October	18.2667
October	17.9333
October	16.5
October	16.5
October	15.7
October	17.6333
October	18.0667
October	17.6
October	17.6
October	17.8333
October	18.3667
October	18.6667
October	19.7667	7.36
October	19.6333	6.68
October	18.5667	7.05
October	18.2333	7.05
November	18.8	7.075
November	17.65	7.34
November	18.4	7.14
November	18.4	6.995
November	19.1	7.01667
November	18.9333	6.82333
November	19.0333	6.44
November	19.9	6.94667
November	19.7333	6.80667
November	18.9667	6.90667
November	19.1667	6.59
November	18.3	6.59667
November	18.1	7.09667
November	18.0667	6.91
November	18.3	6.44
November	18.7667	6.19333
November	18.5	6.24667
November	18.5	6.07667
November	15.5	6.03
November	18.7	6.33333
November	19.3	6.45
November	18.7667	6.21
November	18.8667	5.63333
November	17.8	5.68333
November	16.7	5.515
November	17.1667	4.54
November	17.6	6.27
November	17.8333	6.255
November	17.9667	5.92
November	17.8	6.21
December	17.475	7.03333
December	18	6.78
December	18.025	6.99333
December	17.525	7.07333
December	17.7	7.07333
December	17.55	7.14
December	17.875	7.07333
December	17.325	7.07667
December	17.7	6.88333
December	17.6333	6.95
December	17.6667	6.61
December	16.1	7.49
December	17.4667	6.91
December	17.9333	6.89667
December	15.7	7.62
December	17.8	6.97667
December	18.7333	6.94333
December	17.85	7.69
December	17.8	6.98667
December	17.8667	6.93667
December	18.6333	6.82667
December	19.2	6.85
December	19.2667	6.71667
December	19.3333	6.08
December	19.3667	6.225
December	19.7333	5.76
December	18.75	7.58
December	18.3	7.65
December	18.8	6.78
December	19.1333	6.55667
December	19.5	6.41
January	20.25	4.94
January	20.125	5.2
January	19.3333	5.44667
January	19.2333	5.12
January	19.2	4.77333
January	18.9333	4.88667
January	18.1	4.86333
January	17.4667	5.44333
January	17.6	5.36333
January	18.4667	4.99667
January	19.1333	4.93333
January	19.5	4.92333
January	19.0667	4.59667
January	18.7	4.65333
January	19.9	4.43
January	19.2333	4.51
January	18.8333	4.55333
January	18.5333	4.33333
January	18.3	4.37333
January	18.6667	4.29667
January	20.1	3.96
January	20.5333	3.94
January	21.2333	3.56
January	22.2	3.54
January	21.2667	3.46667
January	21.3	3.59667
January	21.7333	3.62667
January	21	3.58
January	21.0667	3.6
January	21.2333	3.62667
January	21.5	3.36
February	20.9667	3.15
February	21.2	3.19667
February	20.3333	3.68
February	20.2333	3.80667
February	20.4	3.69333
February	19.6667	4.46333
February	20.0333	4.34667
February	19.8667	4.14
February	18.1	4.43667
February	18.3	3.93667
February	19.1	4.03667
February	18.7333	4.08
February	18.3667	3.92
February	17.5333	3.91
February	16.9667	3.83
February	17.3	4.38667
February	17.8	4.29
February	18.3667	4.26667
February	18.6	4.9
February	18.2333	4.91
February	18.0667	4.51333
February	18.4667	4.97
February	18.85	4.71
February	17.7333	5.12
February	18.0667	5.25667
February	18.4333	5.34333
February	19.2667	5.09667
February	17.7	5.17
March	17.7
March	19.1667	5.15
March	19.7667	4.91333
March	18.5	5.70667
March	18.2667	5.19667
March	18.2667	5.02667
March	17.8333	5.11
March	18.2333	4.84333
March	18.1	4.96
March	18.5667	4.94667
March	18.3	5.04
March	18	4.88333
March	18.5	4.78333
March	18.7667	4.45
March	18.7333	4.43667
March	18.8	4.17333
March	19.2	3.17
March	18.7333	5.03333
March	18.5667	5.13
March	19.1667	5.00667
March	18.7667	5.59333
March	18.8333	5.45667
March	19.2	5.37667
March	18.5333	5.82
March	17.8333	6.31667
March	17.8667	6.11
March	18.4	6.21
March	19.2	5.76
March	18.9333	5.91667
March	18.9333	6.02667
March	18.7667	5.84333

## Sheet: Figure 6
	Parameters	Value
	Ammoniacal nitrogen	16.622
	Ammoniacal nitrogen	17.002
	Ammoniacal nitrogen	17.38
	Ammonia	1.19
	Ammonia	1.211
	Ammonia	1.233
	Ammonium	1.258
	Ammonium	1.293
	Ammonium	1.321
	Salinity	34.711
	Salinity	35.152
	Salinity	35.601
	Parameters	Value	Error
	Ammoniacal nitrogen (μg L−1)	17	0.38
	Ammonia (μg L−1)	1.21	0.02
	Ammonium (μg L−1)	1.29	0.03
	Salinity (PSU)	35.15	0.45

## Sheet: Figure 7
Chip code	BIOMETRY OF SARGO (Anisotremus scapularis) SIZE-WEIGHT
	April		May		Jun		Jul		Aug		Sep
	Weight (Kg)	Total Length (cm)	Weight (Kg)	Total Length (cm)	Weight (Kg)	Total Length (cm)	Weight (Kg)	Total Length (cm)	Weight (Kg)	Total Length (cm)	Weight (Kg)	Total Length (cm)
939000001419265	1.775	42.8	1.841	43	2.109	43.2	1.997	43.5	2.07	44.7	2.293	44.9
939000001418824	1.737	42.5	1.938	42.6	1.93	43	2.215	43.2	2.318	44.1	2.02	44.4
939000001426446	1.389	40	1.457	40.5	1.491	40.6	1.594	40.9	1.649	41.4	1.629	41.9
939000001425972	1.09	36.5	1.078	37	1.154	37.2	1.175	37.5	1.199	38.1	1.417	38.3
939000001418802	0.992	36.1	1.195	36.6	1.301	36.9	1.153	37	1.406	38	1.192	38.5
939000001419573	0.945	36	1.008	36.2	1.097	36.4	1.349	36.9	1.189	37.6	1.169	37.7
939000001426408	0.718	32.7	0.779	33	0.826	33.5	0.881	34	0.912	34.7	0.859	35
939000001426567	0.637	31.3	0.692	31.5	0.784	32	0.842	32.8	0.882	33.8	0.847	34.2
939000001426218	0.563	30	0.559	30	0.611	30.7	0.752	31	0.788	32	0.833	32.1
939000001418657	0.517	29.2	0.588	29.5	0.693	30.5	0.664	30.6	0.702	31	0.683	31.5
939000001425610	0.482	27	0.497	27.7	0.528	28.1	0.564	28.5	0.575	29.3	0.598	30
Mean	0.985909	34.9182	1.05745	35.2364	1.13855	35.6455	1.19873	35.9909	1.24455	36.7909	1.23091	37.1364
SD	0.469893	5.36746	0.506436	5.3309	0.528558	5.15778	0.544803	5.10695	0.567591	5.16691	0.556234	5.10397

## Sheet: Figure 8
	Chip code	BIOMETRY OF SARGO (Anisotremus scapularis) SIZE-WEIGHT
		April		May		Jun		Jul		Aug		Sep
		Weight (Kg)	Total Length (cm)	Weight (Kg)	Total Length (cm)	Weight (Kg)	Total Length (cm)	Weight (Kg)	Total Length (cm)	Weight (Kg)	Total Length (cm)	Weight (Kg)	Total Length (cm)
	939000001419265	1.775	42.8	1.841	43	2.109	43.2	1.997	43.5	2.07	44.7	2.293	44.9
	939000001418824	1.737	42.5	1.938	42.6	1.93	43	2.215	43.2	2.318	44.1	2.02	44.4
	939000001426446	1.389	40	1.457	40.5	1.491	40.6	1.594	40.9	1.649	41.4	1.629	41.9
	939000001425972	1.09	36.5	1.078	37	1.154	37.2	1.175	37.5	1.199	38.1	1.417	38.3
	939000001418802	0.992	36.1	1.195	36.6	1.301	36.9	1.153	37	1.406	38	1.192	38.5
	939000001419573	0.945	36	1.008	36.2	1.097	36.4	1.349	36.9	1.189	37.6	1.169	37.7
	939000001426408	0.718	32.7	0.779	33	0.826	33.5	0.881	34	0.912	34.7	0.859	35
	939000001426567	0.637	31.3	0.692	31.5	0.784	32	0.842	32.8	0.882	33.8	0.847	34.2
	939000001426218	0.563	30	0.559	30	0.611	30.7	0.752	31	0.788	32	0.833	32.1
	939000001418657	0.517	29.2	0.588	29.5	0.693	30.5	0.664	30.6	0.702	31	0.683	31.5
	939000001425610	0.482	27	0.497	27.7	0.528	28.1	0.564	28.5	0.575	29.3	0.598	30
	Mean	0.985909	34.9182	1.05745	35.2364	1.13855	35.6455	1.19873	35.9909	1.24455	36.7909	1.23091	37.1364
	SD	0.469893	5.36746	0.506436	5.3309	0.528558	5.15778	0.544803	5.10695	0.567591	5.16691	0.556234	5.10397

## Sheet: Figure 9
		No. of spawning	No. of eggs (x 10e3)	No. fertilized eggs (x 10e3)	Viability (%)
	October	2	132.348	40	30.2234
	November	-	-	0
	December	15	6776.28	6414.53	94.6615
	January	25	6903.14	6307.61	91.3731
	February	4	367.932	187.122	50.8578
	March	20	5208.34	4549.61	87.3524
	April	16	2114.16	1771.72	83.8027
	May	12	1777.84	1507.96	84.8194
